# Supplementary material for: Evidence for Persistent Heteroplasmy and Ancient Recombination in the Mitochondrial Genomes of the Edible Yellow Chanterelles From Southwestern China and Europe
Source: Front Microbiol. 2021 Jul 14;12:699598. doi: 10.3389/fmicb.2021.699598 (PMC8317506; doi:10.3389/fmicb.2021.699598)
Supplement: Supplementary Table 1 — Average evolutionary divergence over tef-1 sequence pairs within and between groups (provincially adopted phylogenetic species) calculated by MEGA 6 using the K2P model. [file Table_1.xls]

## Sheet: MatrixOutput
	C.decolorans	C.cinnabarinus	sp.9	C.texensis	sp.8	C.lewisii	sp.4	sp.5	C.cibarius	C.roseocanus	C.flavus	C.tenuithrix	C.phasmatis	sp.1	C.tuberculosporus	C.yunnanensis	C.anzutake	sp.2	sp.3	C.altipes	sp.6	C.amethysteus	sp.7	C.spectaculus	C.ferruginascens	C.lilacinopruinatus	C.lateritius	C.tomentosus	C.isabellinus	C.appalachiensis	C.tabernensis	C.avellaneus
C.decolorans																																	0
C.cinnabarinus	0.0914866																																0.00272666
sp.9	0.125344	0.0690752																															0
C.texensis	0.0694444	0.0547661	0.0843209																														0
sp.8	0.0843209	0.080504	0.105491	0.0788986																													0
C.lewisii	0.0837148	0.0799519	0.104796	0.0730703	0.00822202																												0
sp.4	0.0975428	0.106626	0.157387	0.102772	0.0656897	0.0652056																											0.000306
sp.5	0.132391	0.1422	0.197948	0.138603	0.0985348	0.0980246	0.031257																										n/c
C.cibarius	0.0958252	0.104821	0.15478	0.101537	0.0646165	0.0641464	0.00255509	0.0303816																									0.00136672
C.roseocanus	0.100453	0.109655	0.161387	0.0947667	0.0688695	0.0683524	0.00600065	0.0339975	0.00479414																								0
C.flavus	0.0891884	0.0979079	0.141362	0.0947667	0.0487158	0.04838	0.0232476	0.0524434	0.0219431	0.025641																							0
C.tenuithrix	0.0910478	0.0991962	0.143541	0.0966621	0.0503501	0.0499998	0.0247466	0.0540489	0.0234334	0.0271515	0.00136612																						0.00273224
C.phasmatis	0.0891884	0.0979079	0.141362	0.0947667	0.0487158	0.04838	0.0232476	0.0524434	0.0219431	0.025641	0	0.00136612																					0
sp.1	0.100516	0.109722	0.154438	0.106317	0.0586442	0.0582216	0.0235794	0.052329	0.022272	0.0259763	0.00857037	0.00998456	0.00857037																				0.000306849
C.tuberculosporus	0.100453	0.109655	0.154572	0.10625	0.0586103	0.0581863	0.0232476	0.0524434	0.0219431	0.025641	0.00826446	0.00967631	0.00826446	0.000292441																			0
C.yunnanensis	0.100453	0.109655	0.154572	0.10625	0.0586103	0.0581863	0.0232476	0.0524434	0.0219431	0.025641	0.00826446	0.00967631	0.00826446	0.000292441	0																		0
C.anzutake	0.109919	0.12156	0.147569	0.117918	0.068713	0.0682153	0.0322528	0.0620991	0.0309005	0.0347074	0.0167811	0.018237	0.0167811	0.0084185	0.00826182	0.00826182																	0.00824767
sp.2	0.134033	0.144249	0.18587	0.140372	0.088592	0.088058	0.0490803	0.0816115	0.0489653	0.0529167	0.034147	0.0356705	0.034147	0.0254154	0.0252373	0.0252373	0.0296453																n/c
sp.3	0.102273	0.111324	0.156255	0.108042	0.0604987	0.0601385	0.02524	0.0500027	0.0239452	0.0276133	0.0103094	0.0117154	0.0103094	0.0103925	0.0103094	0.0103094	0.0188106	0.0362673															0.000741979
C.altipes	0.0788986	0.0971366	0.135954	0.0843209	0.0301724	0.0299462	0.0320792	0.0619277	0.0307375	0.0345167	0.0254534	0.026951	0.0254534	0.0257876	0.0254534	0.0254534	0.0344592	0.0526511	0.0274865														0
sp.6	0.078343	0.0964277	0.137019	0.0837148	0.0345167	0.0343046	0.0411228	0.0716473	0.0389672	0.0436059	0.0389148	0.0404785	0.0389148	0.0392717	0.0389148	0.0389148	0.0483009	0.0671543	0.0409518	0.0124226													n/c
C.amethysteus	0.0762339	0.0941892	0.134458	0.0815661	0.0326885	0.0324921	0.0392608	0.0696507	0.0374262	0.0417295	0.0370708	0.0386237	0.0370708	0.0374243	0.0370708	0.0370708	0.0463967	0.0651577	0.0391156	0.0107424	0.00163934												0.00245902
sp.7	0.0683524	0.0971366	0.135954	0.0735767	0.0301724	0.0299462	0.04139	0.0719114	0.0399933	0.0438994	0.0345167	0.0360668	0.0345167	0.0348666	0.0345167	0.0345167	0.0438155	0.0624574	0.0365111	0.00826446	0.0124226	0.0107424											0
C.spectaculus	0.0941176	0.114759	0.146841	0.111345	0.0532394	0.0529167	0.0559865	0.0875869	0.0545014	0.0586103	0.0487158	0.0503501	0.0487158	0.0490913	0.0487158	0.0487158	0.058484	0.0778478	0.0506483	0.0297733	0.034147	0.0323499	0.0297733										n/c
C.ferruginascens	0.0788601	0.0970868	0.136092	0.084278	0.0310712	0.0308474	0.0412904	0.0719231	0.0399777	0.0438789	0.0354301	0.0369844	0.0354301	0.0357818	0.0354301	0.0354301	0.0447552	0.0634572	0.0374347	0.00910643	0.012433	0.0107513	0.00910643	0.0306773									0.00164272
C.lilacinopruinatus	0.0788986	0.0971366	0.135954	0.0843209	0.0301724	0.0299462	0.04139	0.0719114	0.0399933	0.0438994	0.0345167	0.0360668	0.0345167	0.0348666	0.0345167	0.0345167	0.0438155	0.0624574	0.0365111	0.00826446	0.0124226	0.0107424	0.00826446	0.0297733	0.000821359								n/c
C.lateritius	0.0811411	0.0995339	0.119865	0.0866106	0.0414181	0.0410943	0.063139	0.0953064	0.0616085	0.0658218	0.0556635	0.0573411	0.0556635	0.0458915	0.0458647	0.0458647	0.0538831	0.0747795	0.0575667	0.0274756	0.0318001	0.029989	0.0274756	0.0455538	0.028368	0.0274756							0.00163934
C.tomentosus	0.104796	0.1065	0.152392	0.0826862	0.0826862	0.0770407	0.100789	0.136494	0.0996143	0.104167	0.0985348	0.100412	0.0985348	0.109982	0.109908	0.109908	0.121507	0.144102	0.111884	0.088058	0.0985348	0.0963246	0.088058	0.120998	0.099088	0.09911	0.101479						0
C.isabellinus	0.0898465	0.100964	0.149028	0.0898465	0.0788986	0.078343	0.0751285	0.108737	0.0740358	0.078343	0.0837148	0.0819242	0.0837148	0.0948263	0.0947667	0.0947667	0.106016	0.127821	0.0966138	0.0843209	0.0947667	0.0925354	0.0843209	0.123403	0.0954264	0.0954784	0.0978666	0.0387175					0
C.appalachiensis	0.123608	0.111813	0.123608	0.0887305	0.110084	0.103767	0.0953906	0.130178	0.0937522	0.0926946	0.098178	0.100041	0.098178	0.0982465	0.098178	0.098178	0.105535	0.131248	0.100284	0.082391	0.0926946	0.0905421	0.0931542	0.10891	0.0931487	0.0931542	0.0954558	0.104964	0.128031				0
C.tabernensis	0.123403	0.111634	0.123403	0.088592	0.109908	0.103603	0.095242	0.129968	0.0936065	0.092551	0.0980246	0.099884	0.0980246	0.0980929	0.0980246	0.0980246	0.105369	0.131035	0.100128	0.082265	0.092551	0.0904023	0.0930092	0.108737	0.0930037	0.0930092	0.0953064	0.104796	0.127821	0			0
C.avellaneus	0.142424	0.144249	0.167076	0.111345	0.119132	0.112161	0.127453	0.146841	0.124652	0.130615	0.11819	0.12024	0.11819	0.118049	0.11819	0.11819	0.117918	0.146841	0.132287	0.10122	0.112161	0.109797	0.10122	0.135954	0.112977	0.113043	0.103659	0.109289	0.135954	0.114662	0.114479		n/c
